# Supplementary material for: Characterizing rare and low-frequency height-associated variants in the Japanese population
Source: Nat Commun. 2019 Sep 27;10:4393. doi: 10.1038/s41467-019-12276-5 (PMC6764965; doi:10.1038/s41467-019-12276-5)
Supplement: Supplementary file 5 — Supplementary Data 2 [file 41467_2019_12276_MOESM5_ESM.xlsx]

## Sheet: Supplementary Data 2
Supplementary Data 2. Summary of the 363 height associated loci.
Locus	CHRa	Region of genome-wide significant signals				Number of independently	Lead variant	Positional candidate genes of lead variant	New locus
		froma	toa	range		associated variants in GWAS
Locus1	1	909309	1599888	690580		2	1:1559971_C_T	MIB2	NO
Locus2	1	9248877	9535303	286427		2	1:9472981_T_C	SPSB1,LOC100506022	NO
Locus3	1	17188391	17414305	225915		1	1:17312743_C_T	ATP13A2	NO
Locus4	1	22355978	22458794	102817		1	1:22355978_G_A	LINC00339	NO
Locus5	1	38323553	38463504	139952		1	1:38409073_A_G	INPP5B	NO
Locus6	1	45797505	46605728	808224		1	1:46089225_C_G	CCDC17	NO
Locus7	1	47872619	47933492	60874		1	1:47902817_G_A	LINC01389	NO
Locus8	1	50826176	51796218	970043		1	1:51463424_A_T	CDKN2C,MIR4421	NO
Locus9	1	53533333	53548986	15654		1	1:53548986_C_G	PODN	NO
Locus10	1	56414987	56766830	351844		1	1:56589350_T_C	MIR4422,PPAP2B	NO
Locus11	1	77911130	78518939	607810		1	1:78130243_T_C	ZZZ3	NO
Locus12	1	86010248	86010248	1		1	1:86010248_A_G	DDAH1	NO
Locus13	1	89042433	90069025	1026593		1	1:89189093_G_GC	PKN2	NO
Locus14	1	110486705	110493729	7025		1	1:110493729_G_A	CSF1,AHCYL1	NO
Locus15	1	113042822	113250888	208067		1	1:113242122_T_G	MOV10	NO
Locus16	1	118181802	119836236	1654435		3	1:118849762_G_C	SPAG17,TBX15	NO
Locus17	1	146501334	146884013	382680		1	1:146813358_C_T	CHD1L,LINC00624	NO
Locus18	1	149772131	151443163	1671033		3	1:149892872_A_G	SV2A,SF3B4	NO
Locus19	1	153580311	154477791	897481		2	1:153750682_G_A	SLC27A3	NO
Locus20	1	156894825	157119915	225091		1	1:156981348_G_A	ARHGEF11	NO
Locus21	1	162603696	162661645	57950		1	1:162603881_A_G	DDR2	NO
Locus22	1	170658324	170909674	251351		1	1:170690593_T_G	PRRX1	NO
Locus23	1	172023896	172291533	267638		2	1:172200655_C_A	DNM3	NO
Locus24	1	176596408	176892386	295979		1	1:176787749_CT_C	PAPPA2	NO
Locus25	1	179049606	179541486	491881		1	1:179339262_C_G	AXDND1	NO
Locus26	1	181756342	181756342	1		1	1:181756342_G_A	CACNA1E	NO
Locus27	1	182967471	184331893	1364423		2	1:184007119_C_T	COLGALT2	NO
Locus28	1	214604236	214630757	26522		1	1:214618185_C_T	PTPN14	NO
Locus29	1	218568359	219253006	684648		2	1:218609702_A_G	TGFB2	NO
Locus30	1	227519804	228899698	1379895		1	1:228179099_C_G	WNT9A,WNT3A	NO
Locus31	2	1231705	2140490	908786		1	2:1638793_C_T	PXDN	NO
Locus32	2	16120506	16127607	7102		1	2:16123173_T_C	MYCN,GACAT3	NO
Locus33	2	18571388	18616581	45194		1	2:18600277_G_C	KCNS3,RDH14	NO
Locus34	2	23878102	25530701	1652600		4	2:25150758_T_C	ADCY3,DNAJC27	NO
Locus35	2	27347931	28380295	1032365		2	2:27730940_T_C	GCKR	NO
Locus36	2	33244193	33629344	385152		2	2:33471192_A_G	LTBP1	NO
Locus37	2	36576964	38008662	1431699		6	2:37995422_A_T	CDC42EP3,LINC00211	NO
Locus38	2	44374692	44894142	519451		1	2:44422111_G_A	PPM1B	NO
Locus39	2	54700967	56372061	1671095		3	2:56096892_A_G	EFEMP1	NO
Locus40	2	59793495	59793495	1		1	2:59793495_G_A	LOC101927285,MIR4432	NO
Locus41	2	61399347	62469162	1069816		2	2:61627634_T_G	USP34	NO
Locus42	2	69330118	69331340	1223		2	2:69330284_G_A	ANTXR1	NO
Locus43	2	71305812	74958619	3652808		5	2:72572735_T_C	EXOC6B	NO
Locus44	2	88737865	89128221	390357		1	2:88881648_G_A	EIF2AK3	NO
Locus45	2	95336090	96245182	909093		1	2:95336090_G_T	NONE,FAM95A	NO
Locus46	2	97249400	98369387	1119988		1	2:97523885_G_A	ANKRD39	NO
Locus47	2	109941182	109941554	373		1	2:109941182_G_C	SH3RF3	NO
Locus48	2	121570210	121632454	62245		2	2:121578767_A_G	GLI2	NO
Locus49	2	135941503	136555484	613982		1	2:136376515_A_G	R3HDM1	NO
Locus50	2	191763508	191841879	78372		1	2:191841879_A_G	STAT1	NO
Locus51	2	199877780	201371941	1494162		1	2:200141875_G_A	SATB2	NO
Locus52	2	217565967	220440642	2874676		10	2:219983030_C_T	NHEJ1	NO
Locus53	2	224866387	224889273	22887		1	2:224877252_A_G	SERPINE2	NO
Locus54	2	232274115	233339293	1065179		2	2:233046182_C_T	DIS3L2	NO
Locus55	2	241751708	242604240	852533		4	2:242083763_T_C	PASK	NO
Locus56	3	9972493	10206145	233653		1	3:9975386_C_G	CRELD1, IL17RC	NO
Locus57	3	11630929	11677823	46895		1	3:11677823_A_C	VGLL4	NO
Locus58	3	14255767	14403969	148203		2	3:14255767_T_C	LSM3,LINC01267	NO
Locus59	3	46410494	49838126	3427633		2	3:46977951_G_T	CCDC12	NO
Locus60	3	51410064	53215875	1805812		3	3:53103262_A_G	SFMBT1,RFT1	NO
Locus61	3	57117341	57156535	39195		1	3:57147129_A_G	IL17RD	NO
Locus62	3	72386240	72508896	122657		1	3:72396241_C_T	LINC00870,RYBP	NO
Locus63	3	98928598	99376749	448152		2	3:99347671_G_C	MIR548G	NO
Locus64	3	101357106	101404892	47787		1	3:101357106_T_G	PCNP,ZBTB11	NO
Locus65	3	107181434	107550819	369386		1	3:107184851_C_A	LOC101929607,BBX	NO
Locus66	3	112355269	112878484	523216		3	3:112355269_C_T	CCDC80	NO
Locus67	3	114203969	114462942	258974		1	3:114203969_T_C	LOC101929754	NO
Locus68	3	117605916	117610244	4329		1	3:117605916_A_G	LINC00901,IGSF11	NO
Locus69	3	128781048	129084281	303234		1	3:128983853_A_G	COPG1	NO
Locus70	3	133803719	134386872	583154		2	3:134191938_C_T	MIR4788,ANAPC13	NO
Locus71	3	141026385	141407626	381242		1	3:141118232_T_C	ZBTB38	NO
Locus72	3	145794588	145794588	1		1	3:145794588_T_C	PLOD2	NO
Locus73	3	147292393	147293749	1357		1	3:147292393_G_A	LOC440982,AGTR1	YES
Locus74	3	149372838	149485531	112694		1	3:149375592_G_T	WWTR1	YES
Locus75	3	156851984	158116453	1264470		1	3:157784216_C_T	PQLC2L,SHOX2	NO
Locus76	3	168741644	169247230	505587		3	3:169046537_G_A	MECOM	NO
Locus77	3	171758068	172294031	535964		3	3:171999283_G_T	FNDC3B	NO
Locus78	3	184676057	185541114	865058		2	3:185513482_A_G	IGF2BP2	NO
Locus79	3	187415015	187454731	39717		1	3:187447032_G_A	BCL6	NO
Locus80	3	190726253	190835555	109303		2	3:190819094_A_T	SNAR-I,OSTN	NO
Locus81	3	195197079	195197117	39		1	3:195197079_G_A	ACAP2,MIR5692C1	NO
Locus82	4	2144985	2260204	115220		1	4:2146436_C_T	POLN	NO
Locus83	4	3452345	3468969	16625		1	4:3452345_G_A	HGFAC,DOK7	NO
Locus84	4	8587841	8638924	51084		1	4:8598698_C_T	CPZ	NO
Locus85	4	12892475	12920712	28238		1	4:12892996_A_G	LOC101929019,RAB28	NO
Locus86	4	17380137	18974336	1594200		4	4:17880416_A_C	LCORL	NO
Locus87	4	38498477	39336953	838477		2	4:38504069_T_A	LINC01258	NO
Locus88	4	48480709	48970221	489513		1	4:48687351_A_G	FRYL	NO
Locus89	4	53008832	53073162	64331		1	4:53029685_G_A	SPATA18,USP46	NO
Locus90	4	56253682	56494039	240358		1	4:56424425_A_T	PDCL2	NO
Locus91	4	57713592	57917126	203535		1	4:57798189_G_A	REST	NO
Locus92	4	73264458	73675265	410808		2	4:73529752_C_T	ADAMTS3,COX18	NO
Locus93	4	81988225	82336907	348683		2	4:82200142_T_C	PRKG2,RASGEF1B	NO
Locus94	4	104587896	104703587	115692		1	4:104640935_A_G	TACR3	NO
Locus95	4	105730294	106620197	889904		1	4:106074826_T_G	TET2	NO
Locus96	4	109379728	109452711	72984		1	4:109416136_A_T	LEF1-AS1,RPL34-AS1	NO
Locus97	4	124925947	124971731	45785		1	4:124946032_C_CT	LINC01091,LOC101927087	NO
Locus98	4	139918444	140117997	199554		1	4:139918444_G_A	LINC00499,CCRN4L	NO
Locus99	4	144417447	144515534	98088		1	4:144417447_G_A	GAB1,SMARCA5	NO
Locus100	4	145522663	146177583	654921		3	4:145566848_C_T	HHIP-AS1	NO
Locus101	4	186696269	186701046	4778		1	4:186697494_T_C	SORBS2	NO
Locus102	5	32672781	33399200	726420		3	5:32718044_C_T	NPR3	NO
Locus103	5	36786459	37088627	302169		1	5:37075545_T_G	NIPBL,C5orf42	NO
Locus104	5	39390121	39437527	47407		1	5:39390121_A_AT	DAB2	NO
Locus105	5	42624748	42858101	233354		2	5:42731772_G_A	GHR,CCDC152	NO
Locus106	5	50488774	50500628	11855		1	5:50500628_A_G	LOC100287592,LOC642366	NO
Locus107	5	52521258	52557594	36337		1	5:52557594_G_T	LOC257396,FST	NO
Locus108	5	54458904	55118675	659772		1	5:54901642_A_G	PPAP2A,SLC38A9	NO
Locus109	5	63260063	65450196	2190134		2	5:64644871_C_T	ADAMTS6	NO
Locus110	5	67545624	67623082	77459		1	5:67588000_A_G	PIK3R1	NO
Locus111	5	71901298	72404669	503372		1	5:72200626_G_C	TNPO1	NO
Locus112	5	88203600	88425656	222057		1	5:88342592_C_T	MEF2C-AS1,MIR3660	NO
Locus113	5	112023761	112395949	372189		1	5:112373718_G_A	MCC	NO
Locus114	5	114976512	115077941	101430		1	5:115016389_AT_A	LOC102467217,CDO1	NO
Locus115	5	122649342	122797234	147893		1	5:122716819_C_A	CEP120	NO
Locus116	5	127371588	127801204	429617		2	5:127685135_C_T	FBN2	NO
Locus117	5	131447104	132128644	681541		1	5:132126089_T_TC	SEPT8,SOWAHA	NO
Locus118	5	134331822	134381871	50050		1	5:134356158_T_C	CATSPER3,PITX1	NO
Locus119	5	140528906	142486619	1957714		4	5:140564263_C_T	PCDHB16	NO
Locus120	5	168216489	168280966	64478		1	5:168250903_G_A	SLIT3	NO
Locus121	5	170851624	171442208	590585		4	5:171200659_T_G	FGF18,SMIM23	NO
Locus122	5	172753555	173022152	268598		2	5:172997978_G_A	MIR8056,LOC285593	NO
Locus123	5	175859836	176532318	672483		3	5:176516631_G_A	FGFR4	NO
Locus124	6	1775436	1775863	428		1	6:1775863_G_A	GMDS	NO
Locus125	6	7081785	7733300	651516		2	6:7231843_G_A	RREB1	NO
Locus126	6	23503571	36293672	12790102		10	6:34211341_GT_G	HMGA1	NO
Locus127	6	39776360	39776360	1		1	6:39776360_C_A	DAAM2	NO
Locus128	6	43260660	43382318	121659		1	6:43276390_G_A	CRIP3	NO
Locus129	6	44680555	45357699	677145		1	6:44810351_T_G	SUPT3H	NO
Locus130	6	56288711	56288876	166		1	6:56288711_T_C	RNU6-71P	NO
Locus131	6	76127908	76622964	495057		1	6:76166164_C_T	LOC101928540	NO
Locus132	6	80759476	82164113	1404638		3	6:81338495_C_T	BCKDHB,FAM46A	NO
Locus133	6	89755053	89900599	145547		1	6:89756995_A_G	RNGTT,PNRC1	NO
Locus134	6	105132405	105525332	392928		1	6:105385612_G_A	LINC00577	NO
Locus135	6	107957244	107959416	2173		1	6:107958326_G_A	SOBP	NO
Locus136	6	109006838	109775436	768599		2	6:109654132_T_C	CCDC162P,CD164	NO
Locus137	6	112273151	112297367	24217		1	6:112275360_G_A	FYN,WISP3	NO
Locus138	6	117401992	117559693	157702		1	6:117505882_G_A	RFX6,VGLL2	NO
Locus139	6	130093991	131428910	1334920		5	6:130337266_T_C	TMEM244,L3MBTL3	NO
Locus140	6	132654272	132688042	33771		1	6:132687248_T_C	MOXD1	NO
Locus141	6	140005169	140026049	20881		1	6:140007877_T_C	LOC645434,LOC100132735	NO
Locus142	6	142633744	142866387	232644		1	6:142666861_T_C	ADGRG6	NO
Locus143	6	152012739	152412078	399340		3	6:152126824_T_G	ESR1	NO
Locus144	6	160739590	160787714	48125		1	6:160782934_G_C	SLC22A3	NO
Locus145	6	164103243	164177456	74214		1	6:164173967_C_T	QKI,C6orf118	NO
Locus146	6	169338054	169378595	40542		1	6:169353250_A_G	SMOC2,LOC101929504	NO
Locus147	7	1243525	2913873	1670349		2	7:2758982_G_A	AMZ1,GNA12	NO
Locus148	7	8001001	8148612	147612		1	7:8010634_T_G	GLCCI1	NO
Locus149	7	12610578	12644920	34343		1	7:12610578_C_T	SCIN	NO
Locus150	7	18638652	19654937	1016286		7	7:18698661_T_G	HDAC9	NO
Locus151	7	25951246	26127257	176012		1	7:26029486_T_C	MIR148A,NFE2L3	NO
Locus152	7	30634469	30635521	1053		1	7:30635521_G_C	GARS	NO
Locus153	7	32473442	32908328	434887		1	7:32784727_T_C	MIR550B2,LINC00997	NO
Locus154	7	37394249	38154245	759997		2	7:38146624_AAT_A	EPDR1,STARD3NL	NO
Locus155	7	45916313	46364172	447860		4	7:46073275_T_C	IGFBP3,TNS3	NO
Locus156	7	55771647	56211560	439914		1	7:55956436_A_ATGCGTACATACG	ZNF713	NO
Locus157	7	71699153	73333954	1634802		2	7:73319809_C_T	WBSCR28,ELN	NO
Locus158	7	92084227	92565831	481605		2	7:92408370_C_T	CDK6	NO
Locus159	7	99603716	99746444	142729		1	7:99625796_T_G	ZKSCAN1	NO
Locus160	7	135349273	135362926	13654		1	7:135357476_A_C	C7orf73	NO
Locus161	7	137574082	137605669	31588		1	7:137590864_T_C	CREB3L2	NO
Locus162	7	148629759	148650375	20617		1	7:148631555_A_T	EZH2,GHET1	NO
Locus163	7	150905444	150931659	26216		1	7:150905444_C_T	ABCF2	NO
Locus164	8	13351165	13355424	4260		1	8:13351165_A_G	DLC1	NO
Locus165	8	19363306	19420708	57403		1	8:19363306_G_A	CSGALNACT1	NO
Locus166	8	23124296	24041988	917693		2	8:23171492_G_A	LOXL2	NO
Locus167	8	27617390	27671863	54474		2	8:27630152_G_A	CCDC25	NO
Locus168	8	47286953	47286953	1		1	8:47286953_G_A	NONE,LINC00293	NO
Locus169	8	48379015	49538620	1159606		1	8:49375567_T_C	UBE2V2,LOC101929268	NO
Locus170	8	56454338	58328967	1874630		4	8:57138676_T_G	CHCHD7,SDR16C5	NO
Locus171	8	60533280	60720008	186729		1	8:60599329_T_G	TOX,CA8	NO
Locus172	8	78097161	78272419	175259		1	8:78097161_A_C	PEX2,LOC102724874	NO
Locus173	8	116464988	117574612	1109625		2	8:116602855_T_C	TRPS1	NO
Locus174	8	120467179	120762233	295055		1	8:120467209_C_G	NOV,ENPP2	NO
Locus175	8	129163295	129217909	54615		1	8:129197903_C_G	MIR1208,LINC00824	NO
Locus176	8	130715510	130812339	96830		1	8:130720646_G_C	CCDC26,GSDMC	NO
Locus177	8	135572297	135790335	218039		1	8:135664673_T_G	ZFAT	NO
Locus178	8	142371860	142425325	53466		1	8:142396379_C_CT	GPR20,PTP4A3	NO
Locus179	8	144309595	144992103	682509		2	8:144402338_A_G	TOP1MT	NO
Locus180	9	5089770	5229409	139640		1	9:5089770_G_A	JAK2	NO
Locus181	9	6539256	6540341	1086		1	9:6539256_T_C	GLDC	NO
Locus182	9	16692104	16742058	49955		1	9:16721067_G_A	BNC2	NO
Locus183	9	34628174	35851048	1222875		3	9:35754500_G_A	MSMP	NO
Locus184	9	78505692	78759705	254014		2	9:78511889_G_A	PCSK5	NO
Locus185	9	89775015	90882154	1107140		2	9:89799501_C_A	C9orf170,DAPK1	NO
Locus186	9	94200276	96462560	2262285		2	9:95123569_C_T	CENPP	NO
Locus187	9	98174063	99777420	1603358		4	9:98364547_C_T	PTCH1,LINC00476	NO
Locus188	9	108847841	109663031	815191		3	9:109616024_G_T	LINC01505,ZNF462	NO
Locus189	9	111631647	111929624	297978		1	9:111664178_T_C	IKBKAP	NO
Locus190	9	113792706	114340892	548187		3	9:114287425_T_G	ZNF483	NO
Locus191	9	118072970	119450072	1377103		2	9:118309051_C_T	DEC1,LOC101928775	NO
Locus192	9	123370822	123371583	762		1	9:123370822_T_C	MEGF9	NO
Locus193	9	125605840	126033060	427221		1	9:125956241_T_A	STRBP	NO
Locus194	9	133419664	133525373	105710		1	9:133515338_G_C	FUBP3,PRDM12	NO
Locus195	9	136390116	136403936	13821		1	9:136390116_T_G	TMEM8C	NO
Locus196	9	139081950	139331221	249272		1	9:139101583_G_T	QSOX2	NO
Locus197	10	12645887	12985731	339845		2	10:12945180_G_A	CCDC3	NO
Locus198	10	22344379	23195889	851511		2	10:22847893_A_G	PIP4K2A	NO
Locus199	10	27900882	27953040	52159		1	10:27944544_AG_A	RAB18,MKX	NO
Locus200	10	31082591	31130598	48008		1	10:31118065_G_C	SVILP1,ZNF438	NO
Locus201	10	52780435	52780435	1		1	10:52780435_G_C	PRKG1	NO
Locus202	10	62140840	62167928	27089		1	10:62167928_C_T	ANK3	NO
Locus203	10	63719739	63725942	6204		1	10:63719739_C_T	ARID5B	NO
Locus204	10	70068577	71303321	1234745		2	10:70343196_G_GA	TET1	NO
Locus205	10	73939338	74032366	93029		1	10:73991472_G_A	ANAPC16	YES
Locus206	10	76815686	76855421	39736		1	10:76829757_A_G	DUPD1,DUSP13	NO
Locus207	10	80913782	81144697	230916		2	10:81131332_A_C	PPIF,ZCCHC24	NO
Locus208	10	89782386	89782386	1		1	10:89782386_G_A	PTEN,RNLS	NO
Locus209	10	97800242	97947937	147696		1	10:97877320_T_A	ENTPD1-AS1,ZNF518A	NO
Locus210	10	100016196	100027987	11792		1	10:100027987_C_G	LOXL4	NO
Locus211	10	104964536	105218738	254203		1	10:105148650_A_C	TAF5	NO
Locus212	10	113910721	113950418	39698		1	10:113910721_A_G	GPAM	NO
Locus213	10	124127990	124235355	107366		1	10:124186714_C_T	PLEKHA1	NO
Locus214	10	126260526	126733643	473118		3	10:126583588_T_G	FAM175B,ZRANB1	NO
Locus215	11	2070993	2839751	768759		4	11:2186335_A_G	TH	NO
Locus216	11	8250143	8255408	5266		1	11:8250143_G_C	LMO1	NO
Locus217	11	9386094	9627663	241570		1	11:9537416_G_C	ZNF143	NO
Locus218	11	14149128	15960435	1811308		2	11:14471139_T_G	RRAS2,COPB1	NO
Locus219	11	18625610	18664241	38632		1	11:18638712_A_T	SPTY2D1	NO
Locus220	11	26840304	27016411	176108		1	11:27016411_A_G	FIBIN	NO
Locus221	11	46347068	51445712	5098645		1	11:47447202_T_C	PSMC3	NO
Locus222	11	54785715	58436478	3650764		2	11:57771538_T_A	TMX2-CTNND1,OR9Q1	NO
Locus223	11	61523735	61664711	140977		1	11:61631690_T_C	FADS2	NO
Locus224	11	65661291	65835251	173961		1	11:65782622_G_T	CST6,CATSPER1	NO
Locus225	11	69246077	69280316	34240		3	11:69272096_C_T	MYEOV,LINC01488	NO
Locus226	11	71938774	72149909	211136		1	11:72068278_ACGTG_A	CLPB	NO
Locus227	11	75268337	75285109	16773		2	11:75279290_T_C	SERPINH1	NO
Locus228	11	77924870	78135704	210835		1	11:78134158_C_CTTAAAAA	LOC101928865	NO
Locus229	11	89090384	89224718	134335		1	11:89224453_A_C	NOX4	NO
Locus230	11	120144941	120361394	216454		1	11:120241923_T_C	ARHGEF12	NO
Locus231	11	125818237	126253321	435085		3	11:126234820_G_C	ST3GAL4	NO
Locus232	11	127903854	128691976	788123		2	11:127951062_A_G	LOC101929497,ETS1	NO
Locus233	12	557052	594019	36968		2	12:588604_A_G	B4GALNT3	NO
Locus234	12	2928099	2973887	45789		1	12:2973887_C_A	FOXM1	NO
Locus235	12	4361496	4379831	18336		1	12:4378745_C_CT	CCND2-AS1	NO
Locus236	12	7055380	7571500	516121		1	12:7055380_G_A	PTPN6\x3bC12orf57	NO
Locus237	12	9064374	9103248	38875		1	12:9082581_A_G	PHC1	NO
Locus238	12	11855093	12890626	1035534		3	12:12879254_T_G	APOLD1	NO
Locus239	12	14365109	14484880	119772		1	12:14365109_T_C	GRIN2B,ATF7IP	NO
Locus240	12	20522081	20733777	211697		1	12:20668796_A_G	PDE3A	NO
Locus241	12	28089820	28735596	645777		2	12:28441064_A_G	CCDC91	NO
Locus242	12	30856139	30915620	59482		1	12:30898000_G_A	CAPRIN2	NO
Locus243	12	47143580	47196690	53111		1	12:47184042_C_T	SLC38A4	NO
Locus244	12	53383561	58263852	4880292		7	12:56699429_G_A	CS,CNPY2	NO
Locus245	12	65307160	66442496	1135337		3	12:66349812_A_G	HMGA2	NO
Locus246	12	69158489	69831694	673206		1	12:69827658_G_T	YEATS4,FRS2	NO
Locus247	12	77608050	77611218	3169		1	12:77608050_G_A	E2F7,NAV3	NO
Locus248	12	89943573	90788188	844616		1	12:90228123_C_T	LINC00936,LINC00615	NO
Locus249	12	93770725	94254764	484040		4	12:93985482_T_C	SOCS2,CRADD	NO
Locus250	12	102343470	103615889	1272420		5	12:102551715_G_A	PARPBP	NO
Locus251	12	105140645	105439562	298918		1	12:105156452_G_A	CHST11	NO
Locus252	12	106624275	107370210	745936		1	12:107319661_G_A	RIC8B,TMEM263	NO
Locus253	12	111609727	113470025	1860299		1	12:112241766_G_A	ALDH2	NO
Locus254	12	116392381	116738271	345891		1	12:116529835_G_C	MED13L	NO
Locus255	12	124722104	125076275	354172		2	12:124777631_G_A	FAM101A,ZNF664-FAM101A	NO
Locus256	12	133345812	133485747	139936		2	12:133419838_A_G	CHFR	NO
Locus257	13	33042870	33376884	334015		1	13:33071127_G_C	MINOS1P1	NO
Locus258	13	38108535	38121560	13026		1	13:38111146_G_A	LINC00547	NO
Locus259	13	40212417	40368601	156185		1	13:40345466_C_T	COG6	NO
Locus260	13	41419619	41602462	182844		1	13:41575391_G_A	ELF1	NO
Locus261	13	50592459	51170010	577552		1	13:51152611_G_A	DLEU1,DLEU7	NO
Locus262	13	80916856	80916856	1		1	13:80916856_C_A	SPRY2,LINC00377	NO
Locus263	13	91973621	92063074	89454		1	13:91985971_A_C	LINC00379,MIR17HG	NO
Locus264	13	114301338	115108598	807261		2	13:115074878_C_T	UPF3A,CHAMP1	NO
Locus265	14	21669028	21941914	272887		2	14:21924225_G_A	CHD8,RAB2B	NO
Locus266	14	23746269	23774916	28648		1	14:23746269_C_G	HOMEZ	NO
Locus267	14	36965881	37175718	209838		2	14:37014076_T_C	NKX2-1-AS1,NKX2-8	NO
Locus268	14	55245149	55267512	22364		1	14:55260666_C_A	SAMD4A	NO
Locus269	14	60787269	62363720	1576452		2	14:61108825_C_A	SALRNA1,SIX1	NO
Locus270	14	65464302	65609412	145111		1	14:65542477_A_G	MAX	NO
Locus271	14	68877250	68969163	91914		1	14:68922021_T_C	RAD51B	NO
Locus272	14	74976986	75017130	40145		1	14:74984368_A_G	LTBP2	NO
Locus273	14	92176823	93407301	1230479		4	14:92435065_T_A	TRIP11	NO
Locus274	14	101140866	101240095	99230		1	14:101196269_C_T	DLK1	NO
Locus275	14	102904179	104013073	1108895		2	14:103981942_A_G	MARK3,CKB	NO
Locus276	15	23810652	23810652	1		1	15:23810652_C_T	MKRN3	NO
Locus277	15	48684620	49011049	326430		3	15:48931451_T_C	FBN1	NO
Locus278	15	50695736	51805456	1109721		3	15:51576385_A_G	CYP19A1	NO
Locus279	15	53907948	54018760	110813		1	15:53999128_T_C	WDR72	NO
Locus280	15	61098773	61122711	23939		1	15:61111318_A_G	RORA	NO
Locus281	15	62265019	62381413	116395		1	15:62378136_G_A	C2CD4A,C2CD4B	NO
Locus282	15	66988657	67364320	375664		2	15:66992427_C_T	LINC01169,SMAD6	NO
Locus283	15	70355123	70365762	10640		1	15:70357918_G_A	TLE3	NO
Locus284	15	74214883	76185052	1970170		3	15:75807692_T_C	PTPN9	NO
Locus285	15	81466197	82105900	639704		2	15:81835460_AT_A	TMC3-AS1,MEX3B	NO
Locus286	15	84325760	85657252	1331493		3	15:84585538_A_AAAAAT	ADAMTSL3	NO
Locus287	15	89312787	90253621	940835		7	15:89387904_A_G	ACAN	NO
Locus288	15	99147514	100861305	1713792		11	15:99180205_T_C	FAM169B,IRAIN	NO
Locus289	15	102012626	102015320	2695		1	15:102015320_C_G	PCSK6	NO
Locus290	16	349293	1121434	772142		4	16:349293_A_G	AXIN1	NO
Locus291	16	2265071	2838707	573637		2	16:2803956_C_T	SRRM2	NO
Locus292	16	4029577	4030282	706		1	16:4029971_G_GCT	ADCY9	NO
Locus293	16	12882336	12914838	32503		1	16:12903964_G_A	CPPED1,SHISA9	NO
Locus294	16	14377573	15273720	896148		2	16:14395432_T_C	MKL2,MIR193B	NO
Locus295	16	21367700	22447128	1079429		1	16:22334563_C_T	POLR3E	YES
Locus296	16	51797894	51860916	63023		1	16:51860916_C_A	LINC01571,C16orf97	NO
Locus297	16	67051759	70608775	3557017		2	16:68395371_G_A	SMPD3	NO
Locus298	16	81592748	81592748	1		1	16:81592748_CAGA_C	CMIP	NO
Locus299	16	84872051	84988160	116110		1	16:84872195_G_C	CRISPLD2	NO
Locus300	16	87474919	87540940	66022		2	16:87537311_C_T	LOC101928737	NO
Locus301	16	88783449	89909429	1125981		2	16:89704365_G_C	DPEP1	NO
Locus302	17	6919232	7882428	963197		4	17:7735063_T_G	DNAH2	NO
Locus303	17	21267541	21284673	17133		1	17:21283507_T_G	KCNJ12	NO
Locus304	17	25605271	25650739	45469		1	17:25615547_T_C	NONE,MIR4522	NO
Locus305	17	36899560	38648346	1748787		3	17:38599172_C_A	IGFBP4	NO
Locus306	17	40394090	40962509	568420		1	17:40901824_T_C	EZH1,RAMP2-AS1	NO
Locus307	17	42100749	43232566	1131818		2	17:43216281_C_T	ACBD4	NO
Locus308	17	44595519	45755954	1160436		2	17:45578435_T_A	MRPL45P2,NPEPPS	NO
Locus309	17	46840529	48963765	2123237		3	17:48545926_C_A	CHAD	NO
Locus310	17	54183167	55788490	1605324		4	17:55758646_A_G	MSI2,CCDC182	NO
Locus311	17	59435497	63563281	4127785		5	17:59498052_A_G	C17orf82,TBX4	NO
Locus312	17	65825354	66098154	272801		1	17:65977132_G_A	BPTF	NO
Locus313	17	69912468	70013514	101047		1	17:69992847_T_C	CASC17,LOC102723505	NO
Locus314	17	75380174	75386909	6736		1	17:75386909_A_G	SEPT9	NO
Locus315	18	97958	316352	218395		1	18:258284_C_G	THOC1	NO
Locus316	18	20156688	21200719	1044032		2	18:20735408_T_C	CABLES1	NO
Locus317	18	22842153	22863726	21574		1	18:22842153_C_A	ZNF521	NO
Locus318	18	34094939	34094939	1		1	18:34094939_C_G	FHOD3	YES
Locus319	18	45876302	47053409	1177108		2	18:46657358_C_T	DYM	NO
Locus320	18	57729069	57912226	183158		1	18:57832856_A_AC	PMAIP1,MC4R	NO
Locus321	18	74972138	74972138	1		1	18:74972138_C_T	GALR1	NO
Locus322	18	77225154	77225154	1		1	18:77225154_A_G	NFATC1	NO
Locus323	19	2099820	3492748	1392929		3	19:2135714_T_G	AP3D1	NO
Locus324	19	4741589	4789434	47846		1	19:4781103_G_T	MIR7-3,FEM1A	NO
Locus325	19	7184821	7249858	65038		2	19:7222655_C_T	INSR	NO
Locus326	19	8637967	8658744	20778		1	19:8637967_C_A	MYO1F	NO
Locus327	19	10189959	12076851	1886893		3	19:10742443_C_T	SLC44A2	NO
Locus328	19	13234038	13273358	39321		1	19:13264398_C_T	IER2	NO
Locus329	19	17264961	17275777	10817		1	19:17264961_G_C	MYO9B	NO
Locus330	19	19356992	19663850	306859		1	19:19504167_T_C	GATAD2A	NO
Locus331	19	32903569	32981302	77734		1	19:32912622_A_G	DPY19L3	NO
Locus332	19	37490703	38027046	536344		1	19:38021545_G_A	ZNF793	NO
Locus333	19	41848347	41946095	97749		1	19:41930396_A_G	BCKDHA	NO
Locus334	19	44040253	44086301	46049		1	19:44078228_ATTATT_A	XRCC1	NO
Locus335	19	50038017	50042867	4851		1	19:50042867_T_TG	RCN3	NO
Locus336	19	55612601	55653297	40697		1	19:55653297_A_C	TNNT1	NO
Locus337	20	4088742	4105279	16538		1	20:4090802_G_A	RNF24,SMOX	NO
Locus338	20	6457241	6696338	239098		2	20:6621717_T_A	CASC20,BMP2	NO
Locus339	20	8504593	8525767	21175		1	20:8521304_C_<INS:ME:ALU>	PLCB1	NO
Locus340	20	17546574	17607832	61259		1	20:17594729_G_A	RRBP1	NO
Locus341	20	20854761	22399479	1544719		4	20:21223946_G_GA	KIZ	NO
Locus342	20	31272928	35873195	4600268		4	20:34025983_A_G	GDF5	NO
Locus343	20	39677956	39998491	320536		1	20:39807769_G_A	ZHX3	NO
Locus344	20	44399089	44454487	55399		1	20:44441403_C_G	UBE2C	NO
Locus345	20	47700982	47844341	143360		1	20:47844341_A_G	DDX27	NO
Locus346	20	57245302	57709293	463992		2	20:57432606_T_A	GNAS	NO
Locus347	21	28322506	28322506	1		1	21:28322506_C_A	ADAMTS5	NO
Locus348	21	35228502	35245151	16650		2	21:35243694_A_G	ITSN1	NO
Locus349	21	37692589	37766505	73917		1	21:37750829_T_C	MORC3,CHAF1B	NO
Locus350	21	39603656	40681616	1077961		2	21:39689979_T_TAAG	KCNJ15,LINC01423	NO
Locus351	21	47549363	47549363	1		1	21:47549363_G_C	COL6A2	NO
Locus352	22	24051713	24087185	35473		1	22:24087185_T_C	ZNF70	NO
Locus353	22	31535995	33224439	1688445		1	22:33058602_G_A	SYN3	NO
Locus354	22	38607534	38607534	1		2	22:38607534_T_TG	MAFF	NO
Locus355	22	45675881	46496760	820880		2	22:46483917_G_A	MIRLET7BHG	NO
Locus356	X	54826268	58558380	3732113		1	X:57348523_C_T	FAAH2	NO
Locus357	X	70849834	70854274	4441		1	X:70854274_T_C	BCYRN1	YES
Locus358	X	74094145	78706242	4612098		2	X:76436875_G_C	MIR325,FGF16	NO
Locus359	X	104284958	106732114	2447157		1	X:105477754_T_C	MUM1L1,CXorf57	NO
Locus360	X	118535241	118754671	219431		1	X:118594422_T_C	SLC25A43,SLC25A5-AS1	NO
Locus361	X	128926896	130095251	1168356		1	X:129325425_T_C	RAB33A,ZNF280C	YES
Locus362	X	133086710	133790275	703566		1	X:133683590_C_G	LINC00629	YES
Locus363	X	139256409	139282091	25683		1	X:139282091_C_T	LOC389895,SOX3	YES
aChromosomes and positions are based on Build37 (hg19).
