# Supplementary material for: Characterizing rare and low-frequency height-associated variants in the Japanese population
Source: Nat Commun. 2019 Sep 27;10:4393. doi: 10.1038/s41467-019-12276-5 (PMC6764965; doi:10.1038/s41467-019-12276-5)
Supplement: Supplementary file 13 — Supplementary Data 10 [file 41467_2019_12276_MOESM13_ESM.xlsx]

## Sheet: Supplementary Data 10
Supplementary Data 10. Single variant associations of nonsynonymous variants in CYP26B1.
rsID	CHRa	POSa	REF/ALT	Amino acid change in CCDS1919.1		GWAS (N = 159,095)						Replication (N = 30,303)						Allele frequency in non-EastAsian population
						Rsq	Genotyped	MAF	BETA (SE)	P_BOLT		Rsq	Genotyped	MAF	BETA (SE)	P_BOLT		1000g2014oct_eur	ExAC_FIN	ExAC_NFE	1000g2014oct_afr	ExAC_AFR	1000g2014oct_amr	ExAC_AMR	ExAC_SAS
rs79138418	2	72359448	C/T	p.V483M		0.91445	Genotyped	0.00129	0.035 (0.044)	0.22		0.94089	Genotyped	0.00106054	0.022 (0.113)	0.97		NA	0.0003	0	0.0008	0.0004	NA	0	8.098e-05
rs148075682	2	72359460	C/T	p.V479I		0.26938	NA	NA	NA	NA		0.33751	Imputed	5.40251e-05	0.418 (0.790)	0.81		NA	0	4.023e-05	NA	0	NA	0.0001	0.0002
NA	2	72359467	C/G	p.L476F		0.63703	Imputed	0.00109	0.199 (0.058)	0.00056		0.6322	Imputed	0.000942459	0.098 (0.144)	0.34		NA	NA	NA	NA	NA	NA	NA	NA
rs201193616	2	72359508	G/A	p.R463C		0.49996	Imputed	0.0008	-0.030 (0.075)	0.97		0.41833	Imputed	0.000645137	0.088 (0.214)	0.92		NA	0	3.253e-05	NA	0	NA	0.0003	0
NA	2	72359613	G/A	p.R428C		0.41772	Imputed	0.00047	-0.167 (0.111)	0.081		0.49969	Imputed	0.000452044	0.081 (0.234)	0.81		NA	0.0002	0	NA	0	NA	0	0
NA	2	72359633	C/T	p.R421Q		0.54996	Imputed	0.00096	0.177 (0.068)	0.0018		0.5825	Imputed	0.00110571	0.145 (0.136)	0.27		NA	0	0	NA	0	NA	0	0
rs571722272	2	72359634	G/A	p.R421W		0.52772	Imputed	0.00026	0.083 (0.134)	0.48		0.61634	Imputed	0.000255832	0.243 (0.277)	0.51		NA	0	1.52e-05	NA	0	NA	0	6.192e-05
rs2286965	2	72360160	C/T	p.E380K		0.99004	Genotyped	0.03193	0.071 (0.009)	1.4e-17		0.98967	Genotyped	0.028939	0.082 (0.021)	7.4e-05		NA	0	0.0001	NA	0.0001	NA	0	0.0004
NA	2	72360187	C/T	p.G371S		0.85939	Imputed	0.00204	-0.008 (0.036)	0.54		0.83223	Imputed	0.00175993	0.122 (0.093)	0.26		NA	NA	NA	NA	NA	NA	NA	NA
NA	2	72360244	G/A	p.R352C		0.36697	Imputed	0.0002	-0.143 (0.194)	0.37		0.41174	Imputed	0.000159996	-0.147 (0.409)	0.54		NA	0	0	NA	0	NA	0	0
rs199651471	2	72360292	C/T	p.G336S		0.73854	Imputed	0.00495	0.007 (0.026)	0.64		0.75504	Imputed	0.00518115	-0.042 (0.057)	0.46		NA	0	1.594e-05	NA	0.0003	NA	0	0
rs199909218	2	72360319	G/A	p.R327W		0.3452	Imputed	0.00071	0.217 (0.098)	0.014		0.39527	Imputed	0.000721283	-0.080 (0.212)	0.71		NA	0	3.264e-05	0.0008	0.0001	NA	0	0
rs138478634	2	72360331	G/A	p.R323W		0.89576	Imputed	0.0261	0.106 (0.010)	1.9e-25		0.98019	Genotyped	0.0215399	0.110 (0.025)	2.6e-05		NA	0	1.663e-05	0.0008	0.0006	NA	0.0004	0.0003
rs2241057	2	72361960	A/G	p.L264S		0.99467	Genotyped	0.09188	0.029 (0.005)	2.5e-07		0.99441	Genotyped	0.0937205	0.037 (0.012)	0.0048		0.165	0.1386	0.1492	0.2897	0.2939	0.2104	0.3308	0.0896
NA	2	72362362	C/T	p.D206N		0.75928	Imputed	0.00076	-0.024 (0.063)	0.52		0.74139	Imputed	0.000677684	0.025 (0.159)	0.98		NA	0	0	NA	0	NA	0	0
rs201533354	2	72362449	C/T	p.E177K		0.59732	Imputed	0.00122	0.069 (0.056)	0.23		0.6241	Imputed	0.00097953	-0.099 (0.143)	0.45		NA	0	0.0001	NA	0	NA	8.643e-05	0.0008
rs377118511	2	72362467	C/T	p.A171T		0.63691	Imputed	0.00162	0.032 (0.049)	0.71		0.6873	Imputed	0.00195337	-0.103 (0.096)	0.35		NA	0	6.01e-05	NA	0.0005	NA	8.643e-05	0.0002
rs572989034	2	72362512	T/C	p.S156G		0.57515	Imputed	0.00134	0.020 (0.057)	0.8		0.5866	Imputed	0.0013689	0.054 (0.125)	0.51		NA	0	0	NA	0	NA	0	0.0033
rs200324765	2	72371128	T/A	p.N140I		0.91665	Imputed	0.00435	0.158 (0.024)	1.4e-11		0.9017	Imputed	0.00318516	0.186 (0.066)	0.011		NA	0	0	NA	0	NA	0	0
aChromosomes and positions are based on Build37 (hg19).
																						0
